# Supplementary material for: A Simple and Highly Specific MassARRAY-Based Stool DNA Assay to Prioritize Follow-up Decisions in Fecal Immunochemical Test-Positive Individuals
Source: PubMed Central journal article supplement (PMC6468462; doi:10.3390/cancers11030423), 2019-03-25

**Supplementary Table 1.**

A. PCR primer sequences and amplicon sizes for the CGMH stool DNA panel.

| PCR Primer ID               | Sequence                        | Amplicon size (bp) |
|-----------------------------|---------------------------------|--------------------|
| APC_c.2626CtT-1st-PCR       | ACGTTGGATGTCTAGGCAACTACCATCCAG  | 117                |
| APC_c.2626CtT-2nd-PCR       | ACGTTGGATGCATGACTTTGGCAATCTGGG  |                    |
| APC_c.3340CtT-1st-PCR       | ACGTTGGATGTTTCTCCATACAGGTCACGG  | 117                |
| APC_c.3340CtT-2nd-PCR       | ACGTTGGATGTGACACAAAGACTGGCTTAC  |                    |
| APC_c.3871CtT-1st-PCR       | ACGTTGGATGTGCAGGGTATTAGCAGAATC  | 96                 |
| APC_c.3871CtT-2nd-PCR       | ACGTTGGATGCATCTTTGTCATCAGCTGAAG |                    |
| APC_c.G3916TF-1st-PCR       | ACGTTGGATGAGCTGACCTAGTTCCAATC   | 102                |
| APC_c.G3916TF-2nd-PCR       | ACGTTGGATGAATCAGACGACACAGGAAGC  |                    |
| APC_c.4348CtT-1st-PCR       | ACGTTGGATGCTCTCTCTTTTCAGCAGTAG  | 110                |
| APC_c.4348CtT-2nd-PCR       | ACGTTGGATGAGAAGTAAAACACCTCCACC  |                    |
| APC_c.4660-4661-1st-PCR     | ACGTTGGATGCTGAATCATCTAATAGGTCC  | 104                |
| APC_c.4660-4661-2nd-PCR     | ACGTTGGATGTCAGAGCAGCCTAAAGAATC  |                    |
| KRAS_c.34-38 exon2-1st-PCR  | ACGTTGGATGAGGCCTGCTGAAAATGACTG  | 100                |
| KRAS_c.34-38 exon2-2nd-PCR  | ACGTTGGATGTTAGCTGTATCGTCAAGGCA  |                    |
| KRAS_c.A183 exon3-1st-PCR   | ACGTTGGATGATGTACTGGTCCCTCATTGC  | 97                 |
| KRAS_c.A183 exon3-2nd-PCR   | ACGTTGGATGGATTCTACAGGAAGCAAGTA  |                    |
| KRAS_c.G436AF exon4-1st-PCR | ACGTTGGATGTTTCAGTGTTACTTACCTGTC | 101                |
| KRAS_c.G436AF exon4-2nd-PCR | ACGTTGGATGGGCTCAGGACTTAGCAAGAA  |                    |
| TP53_c.524G>AR-1st-PCR      | ACGTTGGATGTCTACAAGCAGTCACAGCAC  | 102                |
| TP53_c.524G>AR-2nd-PCR      | ACGTTGGATGTGCTCACCATCGCTATCTGA  |                    |
| TP53_c.637C>T-1st-PCR       | ACGTTGGATGAGTTGCAAACCAGACCTCAG  | 105                |
| TP53_c.637C>T-2nd-PCR       | ACGTTGGATGGCGTGTGGAGTATTTGGATG  |                    |
| PIK3CA_c.G263-333-1st-PCR   | ACGTTGGATGGAAAGGGACAACAGTTAAGC  | 102                |
| PIK3CA_c.G263-333-2nd-PCR   | ACGTTGGATGCGTAAGTGTACTCAAGAAGC  |                    |
| PIK3CA_c.1035T>A-1st-PCR    | ACGTTGGATGGCATCAGCATTGACTTTACC  | 117                |
| PIK3CA_c.1035T>A-2nd-PCR    | ACGTTGGATGGGGTTATAAATAGTGCACTC  |                    |
| PIK3CA_c.G1633A-1st-PCR     | ACGTTGGATGTAGCACTTACCTGTGACTCC  | 91                 |
| PIK3CA_c.G1633A-2nd-PCR     | ACGTTGGATGTACACGAGATCCTCTCTCTG  |                    |
| PIK3CA_c.A3073GF-1st-PCR    | ACGTTGGATGTACTCCAAAGCCTCTTGCTC  | 114                |
| PIK3CA_c.A3073GF-2nd-PCR    | ACGTTGGATGCTCTGGAATGCCAGAACTAC  |                    |
| SMAD4_c.1081-1082-1st-PCR   | ACGTTGGATGCTGTGGACATTGGAGAGTTG  | 90                 |
| SMAD4_c.1081-1082-2nd-PCR   | ACGTTGGATGCTGTTGATGGATACGTGGAC  |                    |

**B. Extension primer sequences and their distributions in the four wells.**

| <b>Extension Primer ID</b> | <b>Sequence</b>           | <b>Well ID</b> |
|----------------------------|---------------------------|----------------|
| APC_c.C2626T               | GGAGATCTGCAAACCTC         | 4              |
| APC_c.C3340T               | GCCAATGGTTCAGAAACAAAT     | 2              |
| APC_c.C3871T               | TGAAGATGAAATAGGATGTAAT    | 2              |
| APC_c.G3916T               | CTAATACCCTGCAAATAGCA      | 4              |
| APC_c.C4348T               | CTCAAACAGCTCAAACCAAG      | 2              |
| APC_c.4661dupA             | CCTTTTCAGAATCAATAGTTTTTTT | 4              |
| KRAS_c.G34ToAF             | TaGTGGTAGTaGGAGCT         | 1              |
| KRAS_c.G35AoTR             | CACTCTTGCCTACGCCA         | 2              |
| KRAS_c.G38AF               | AGGCACTCTTGCCTACG         | 2              |
| KRAS_c.A183CF              | gCTCGACACAGCAGGTCA        | 3              |
| KRAS_c.G436AF              | AATTCCTTTTATTGAAACATCA    | 1              |
| TP53_c.G524AR              | GCTCATGGTGGGGGCAG         | 4              |
| TP53_c.C637T               | GGATGACAGAAACACTTTT       | 2              |
| PIK3CA_c.G263AF            | AGCCGAAGGTCACAAAGT        | 4              |
| PIK3CA_c.T1035A            | CTTATCAATGTCTCGAATATTAC   | 3              |
| PIK3CA_c.G1633A            | ccAGAAAATCTTTCTCCTGCT     | 4              |
| PIK3CA_c.A3073GF           | TGACATTGCATACATTCGAAAG    | 3              |
| SMAD4_c.G1082AF            | CGTGGACCCTTCTGGAGGAGATC   | 1              |

**Supplementary Table 2. FIT value and variants detected using the CGMH stool DNA panel in 101 participants of cohort 2.**

| Stool ID | Age | Gender (F=0, M=1) | Diagnosis | FIT (ng/mL)                   | Presence of stool variant |                         |                         |                           |                          | Sum of score (FIT+ variants) |
|----------|-----|-------------------|-----------|-------------------------------|---------------------------|-------------------------|-------------------------|---------------------------|--------------------------|------------------------------|
|          |     |                   |           | Weighting factor=1 when >=500 | APC Weighting factor=1    | KRAS Weighting factor=1 | TP53 Weighting factor=2 | PIK3CA Weighting factor=2 | SMAD4 Weighting factor=2 |                              |
|          |     |                   |           |                               |                           |                         |                         |                           |                          |                              |
| 372      | 53  | 0                 | Normal    | 121                           |                           |                         |                         |                           |                          | 0                            |
| 798      | 58  | 1                 | Normal    | 137                           |                           |                         |                         |                           |                          | 0                            |
| 819      | 47  | 1                 | Normal    | 100                           |                           |                         |                         |                           |                          | 0                            |
| 820      | 53  | 0                 | Normal    | 319                           |                           |                         |                         |                           |                          | 0                            |
| 821      | 34  | 1                 | Normal    | 100                           |                           |                         |                         |                           |                          | 0                            |
| 822      | 63  | 1                 | Normal    | 215                           |                           |                         |                         |                           |                          | 0                            |
| 823      | 67  | 0                 | Normal    | 404                           |                           |                         |                         |                           |                          | 0                            |
| 851      | 59  | 0                 | Normal    | 100                           |                           |                         |                         |                           |                          | 0                            |
| 852      | 58  | 0                 | Normal    | 465                           |                           |                         |                         |                           |                          | 0                            |
| 855      | 53  | 1                 | Normal    | 138                           |                           |                         |                         |                           |                          | 0                            |
| 856      | 75  | 0                 | Normal    | 305                           |                           |                         |                         |                           |                          | 0                            |
| 866      | 53  | 0                 | Normal    | 134                           |                           |                         |                         |                           |                          | 0                            |
| 958      | 62  | 1                 | Normal    | 103                           |                           |                         |                         |                           |                          | 0                            |
| 1151     | 52  | 1                 | Normal    | 345                           |                           |                         |                         |                           |                          | 0                            |
| 1152     | 58  | 0                 | Normal    | 100                           |                           |                         |                         |                           |                          | 0                            |
| 1158     | 53  | 0                 | Normal    | 286                           |                           |                         |                         |                           |                          | 0                            |
| 384      | 52  | 1                 | Normal    | 780                           |                           |                         |                         |                           |                          | 1                            |
| 813      | 73  | 0                 | Normal    | >1000                         |                           |                         |                         |                           |                          | 1                            |
| 875      | 58  | 0                 | Normal    | >1000                         |                           |                         |                         |                           |                          | 1                            |
| 2798     | 56  | 0                 | Normal    | 928                           |                           |                         |                         |                           |                          | 1                            |
| 288      | 61  | 1                 | B-polyp   | 222                           |                           |                         |                         |                           |                          | 0                            |
| 332      | 54  | 1                 | B-polyp   | 328                           |                           |                         |                         |                           |                          | 0                            |
| 792      | 74  | 1                 | B-polyp   | 133                           |                           |                         |                         |                           |                          | 0                            |
| 799      | 67  | 0                 | B-polyp   | 113                           |                           |                         |                         |                           |                          | 0                            |
| 803      | 74  | 0                 | B-polyp   | 410                           |                           |                         |                         |                           |                          | 0                            |
| 805      | 61  | 0                 | B-polyp   | 432                           |                           |                         |                         |                           |                          | 0                            |
| 812      | 55  | 1                 | B-polyp   | 162                           |                           |                         |                         |                           |                          | 0                            |
| 859      | 74  | 1                 | B-polyp   | 149                           |                           |                         |                         |                           |                          | 0                            |
| 953      | 55  | 1                 | B-polyp   | 194                           |                           |                         |                         |                           |                          | 0                            |

|      |    |   |           |       |          |        |         |  |  |   |
|------|----|---|-----------|-------|----------|--------|---------|--|--|---|
| 1112 | 60 | 0 | B-polyp   | 100   |          |        |         |  |  | 0 |
| 1183 | 66 | 1 | B-polyp   | 299   |          |        |         |  |  | 0 |
| 2807 | 62 | 1 | B-polyp   | 165   |          |        |         |  |  | 0 |
| 836  | 72 | 1 | B-polyp   | 308   |          |        |         |  |  | 0 |
| 863  | 73 | 1 | B-polyp   | >1000 |          |        |         |  |  | 1 |
| 1156 | 78 | 1 | B-polyp   | >1000 |          |        |         |  |  | 1 |
| 2806 | 60 | 1 | B-polyp   | 784   |          |        |         |  |  | 1 |
| 2901 | 72 | 1 | B-polyp   | 644   |          |        |         |  |  | 1 |
| 816  | 72 | 1 | B-polyp   | 260   |          |        | p.R175H |  |  | 2 |
| 381  | 59 | 0 | B-polyp   | 723   |          | p.G12A |         |  |  | 2 |
| 796  | 66 | 1 | Ad-polyp  | 372   |          |        |         |  |  | 0 |
| 957  | 73 | 0 | Ad-polyp  | 119   |          |        |         |  |  | 0 |
| 1113 | 67 | 1 | Ad-polyp  | 345   |          |        |         |  |  | 0 |
| 1157 | 60 | 1 | Ad-polyp  | 134   |          |        |         |  |  | 0 |
| 2792 | 59 | 0 | Ad-polyp  | 125   |          |        |         |  |  | 0 |
| 959  | 65 | 1 | Ad-polyp  | >1000 |          |        |         |  |  | 1 |
| 2805 | 61 | 1 | Ad-polyp  | >1000 |          |        |         |  |  | 1 |
| 2795 | 64 | 1 | Ad-polyp  | 520   | p.R1114* | p.G12D |         |  |  | 3 |
| 775  | 70 | 1 | Early-CRC | 428   |          |        |         |  |  | 0 |
| 830  | 81 | 1 | Early-CRC | 418   |          |        |         |  |  | 0 |
| 1184 | 50 | 0 | Early-CRC | 278   |          |        |         |  |  | 0 |
| 1556 | 50 | 0 | Early-CRC | 390   |          |        |         |  |  | 0 |
| 1665 | 63 | 0 | Early-CRC | 180   |          |        |         |  |  | 0 |
| 776  | 70 | 0 | Early-CRC | >1000 |          |        |         |  |  | 1 |
| 872  | 64 | 1 | Early-CRC | >1000 |          |        |         |  |  | 1 |
| 1162 | 59 | 0 | Early-CRC | 808   |          |        |         |  |  | 1 |
| 1181 | 66 | 0 | Early-CRC | >1000 |          |        |         |  |  | 1 |
| 1186 | 73 | 1 | Early-CRC | >1000 |          |        |         |  |  | 1 |
| 1281 | 60 | 1 | Early-CRC | >1000 |          |        |         |  |  | 1 |
| 1523 | 48 | 1 | Early-CRC | >1000 |          |        |         |  |  | 1 |
| 1525 | 50 | 1 | Early-CRC | >1000 |          |        |         |  |  | 1 |
| 1580 | 60 | 0 | Early-CRC | >1000 |          |        |         |  |  | 1 |
| 1582 | 48 | 0 | Early-CRC | >1000 |          |        |         |  |  | 1 |
| 1591 | 61 | 1 | Early-CRC | >1000 |          |        |         |  |  | 1 |
| 1610 | 58 | 1 | Early-CRC | >1000 |          |        |         |  |  | 1 |
| 1615 | 79 | 1 | Early-CRC | 609   |          |        |         |  |  | 1 |
| 769  | 45 | 1 | Early-CRC | >1000 |          | p.G13D |         |  |  | 2 |

|      |    |   |           |       |                     |         |         |         |  |   |
|------|----|---|-----------|-------|---------------------|---------|---------|---------|--|---|
| 811  | 65 | 1 | Early-CRC | >1000 |                     | p.G12D  |         |         |  | 2 |
| 848  | 51 | 1 | Early-CRC | >1000 |                     | p.G13D  |         |         |  | 2 |
| 1114 | 62 | 0 | Early-CRC | >1000 |                     | p.G12D  |         |         |  | 2 |
| 1283 | 59 | 1 | Early-CRC | >1000 |                     | p.G13D  |         |         |  | 2 |
| 1577 | 64 | 1 | Early-CRC | >1000 |                     | p.G12D  |         |         |  | 2 |
| 774  | 71 | 0 | Early-CRC | 895   |                     |         | p.R175H |         |  | 3 |
| 841  | 60 | 1 | Early-CRC | >1000 |                     |         | p.R175H |         |  | 3 |
| 788  | 61 | 0 | Early-CRC | >1000 |                     | p.G12V  |         | p.E545K |  | 4 |
| 784  | 55 | 1 | Late-CRC  | 248   |                     |         |         |         |  | 0 |
| 802  | 74 | 0 | Late-CRC  | 324   |                     |         |         |         |  | 0 |
| 1174 | 57 | 1 | Late-CRC  | 126   |                     |         |         |         |  | 0 |
| 1277 | 74 | 1 | Late-CRC  | 474   |                     |         |         |         |  | 0 |
| 1570 | 42 | 0 | Late-CRC  | 230   |                     |         |         |         |  | 0 |
| 791  | 74 | 0 | Late-CRC  | >1000 |                     |         |         |         |  | 1 |
| 829  | 65 | 0 | Late-CRC  | >1000 |                     |         |         |         |  | 1 |
| 1175 | 73 | 0 | Late-CRC  | 714   |                     |         |         |         |  | 1 |
| 1179 | 57 | 0 | Late-CRC  | >1000 |                     |         |         |         |  | 1 |
| 1284 | 76 | 1 | Late-CRC  | >1000 |                     |         |         |         |  | 1 |
| 1302 | 70 | 1 | Late-CRC  | >1000 |                     |         |         |         |  | 1 |
| 1522 | 77 | 0 | Late-CRC  | >1000 |                     |         |         |         |  | 1 |
| 1555 | 64 | 1 | Late-CRC  | >1000 |                     |         |         |         |  | 1 |
| 1598 | 73 | 0 | Late-CRC  | >1000 |                     |         |         |         |  | 1 |
| 1648 | 61 | 1 | Late-CRC  | >1000 |                     |         |         |         |  | 1 |
| 826  | 54 | 1 | Late-CRC  | 190   |                     |         | p.R175H |         |  | 2 |
| 846  | 64 | 1 | Late-CRC  | 456   | p.R1114*            | p.G12D  |         |         |  | 2 |
| 867  | 85 | 0 | Late-CRC  | >1000 |                     | p.G12A  |         |         |  | 2 |
| 1150 | 49 | 1 | Late-CRC  | >1000 |                     | p.G12D  |         |         |  | 2 |
| 1163 | 61 | 1 | Late-CRC  | >1000 | p.R876*             |         |         |         |  | 2 |
| 1187 | 63 | 0 | Late-CRC  | >1000 |                     | p.G12V  |         |         |  | 2 |
| 779  | 51 | 1 | Late-CRC  | >1000 | p.R876*             | p.G12D  |         |         |  | 3 |
| 1301 | 22 | 1 | Late-CRC  | >1000 | p.R1450*            | p.G12D  |         |         |  | 3 |
| 1581 | 63 | 1 | Late-CRC  | 100   |                     | p.A146T |         | p.E545K |  | 3 |
| 1644 | 63 | 0 | Late-CRC  | >1000 | p.R876*             | p.A146T |         |         |  | 3 |
| 1185 | 66 | 1 | Late-CRC  | >1000 | p.R1450*            | p.A146T | p.R175H |         |  | 5 |
| 1153 | 60 | 0 | Late-CRC  | >1000 | p.R1450*<br>p.R876* | p.G12V  | p.R175H | p.E545K |  | 7 |

**Supplementary Table 3. Proportion of human DNA in the CGMH stool DNA of cohort 1.**

| Group  | Sample ID | Stool DNA conc. (ng/uL) | Human DNA calculated by RNase P PCR (ng/uL) | Human DNA in total stool DNA (%) |
|--------|-----------|-------------------------|---------------------------------------------|----------------------------------|
| Normal | N-1       | 109.9                   | 6.66                                        | 6.056                            |
|        | N-2       | 1156.8                  | 0.14                                        | 0.012                            |
|        | N-3       | 591.2                   | 0.20                                        | 0.034                            |
|        | N-4       | 278.5                   | 3.09                                        | 1.109                            |
|        | N-5       | 681.1                   | 2.57                                        | 0.377                            |
|        | N-6       | 347.9                   | 0.84                                        | 0.241                            |
|        | N-7       | 1291.6                  | 0.07                                        | 0.005                            |
|        | N-8       | 598.9                   | 0.17                                        | 0.029                            |
|        | N-9       | 1772                    | 0.24                                        | 0.013                            |
| Polyps | 45605     | 955.6                   | 0.04                                        | 0.004                            |
|        | 36137     | 65.3                    | 0.78                                        | 1.200                            |
|        | 91739     | 914.8                   | 0.06                                        | 0.006                            |
|        | 45248     | 665                     | 0.24                                        | 0.036                            |
|        | 88633     | 190.8                   | 2.77                                        | 1.454                            |
|        | 30523     | 70                      | 0.85                                        | 1.220                            |
|        | 17766     | 1668.3                  | 0.11                                        | 0.007                            |
|        | 90511     | 924.9                   | 0.44                                        | 0.047                            |
|        | 18039     | 195.2                   | 0.90                                        | 0.460                            |
|        | 44111     | 494.4                   | 0.35                                        | 0.070                            |
|        | 28808     | 1894.1                  | 0.01                                        | 0.000                            |
|        | 60570     | 396.9                   | 23.71                                       | 5.973                            |
|        | 34335     | 802.4                   | 0.22                                        | 0.028                            |
| 13849  | 270.3     | 2.77                    | 1.026                                       |                                  |
| 29563  | 271.8     | 0.19                    | 0.070                                       |                                  |
| CRC    | 1325      | 69.9                    | 3.22                                        | 4.613                            |
|        | 1387      | 180.8                   | 0.03                                        | 0.019                            |
|        | 1736      | 37                      | 0.62                                        | 1.684                            |

|      |       |      |       |
|------|-------|------|-------|
| 1454 | 72.4  | 0.33 | 0.454 |
| 1317 | 13.5  | 0.35 | 2.568 |
| 1455 | 83.9  | 4.30 | 5.122 |
| 1465 | 66.4  | 0.83 | 1.252 |
| 1371 | 230.6 | 6.45 | 2.796 |
| 1423 | 484.7 | 0.09 | 0.018 |
| 1801 | 692.1 | 0.62 | 0.090 |
| 1453 | 421.6 | 0.17 | 0.039 |
| 1897 | 652.5 | 1.09 | 0.167 |
| 1425 | 20.9  | 2.08 | 9.929 |
| 1657 | 638.6 | 0.61 | 0.095 |
| 1539 | 492.3 | 0.02 | 0.004 |
| 1738 | 116.7 | 3.14 | 2.693 |
| 1840 | 109.2 | 0.98 | 0.895 |
| 1480 | 272.5 | 0.24 | 0.088 |
| 1773 | 307   | 0.24 | 0.080 |
| 1445 | 64.1  | 2.82 | 4.398 |
| 1723 | 31.6  | 0.54 | 1.722 |

---

**Supplementary figure. Accuracy check of MassARRAY stool DNA panel, performed using diluted DNA from tissues with known mutations**

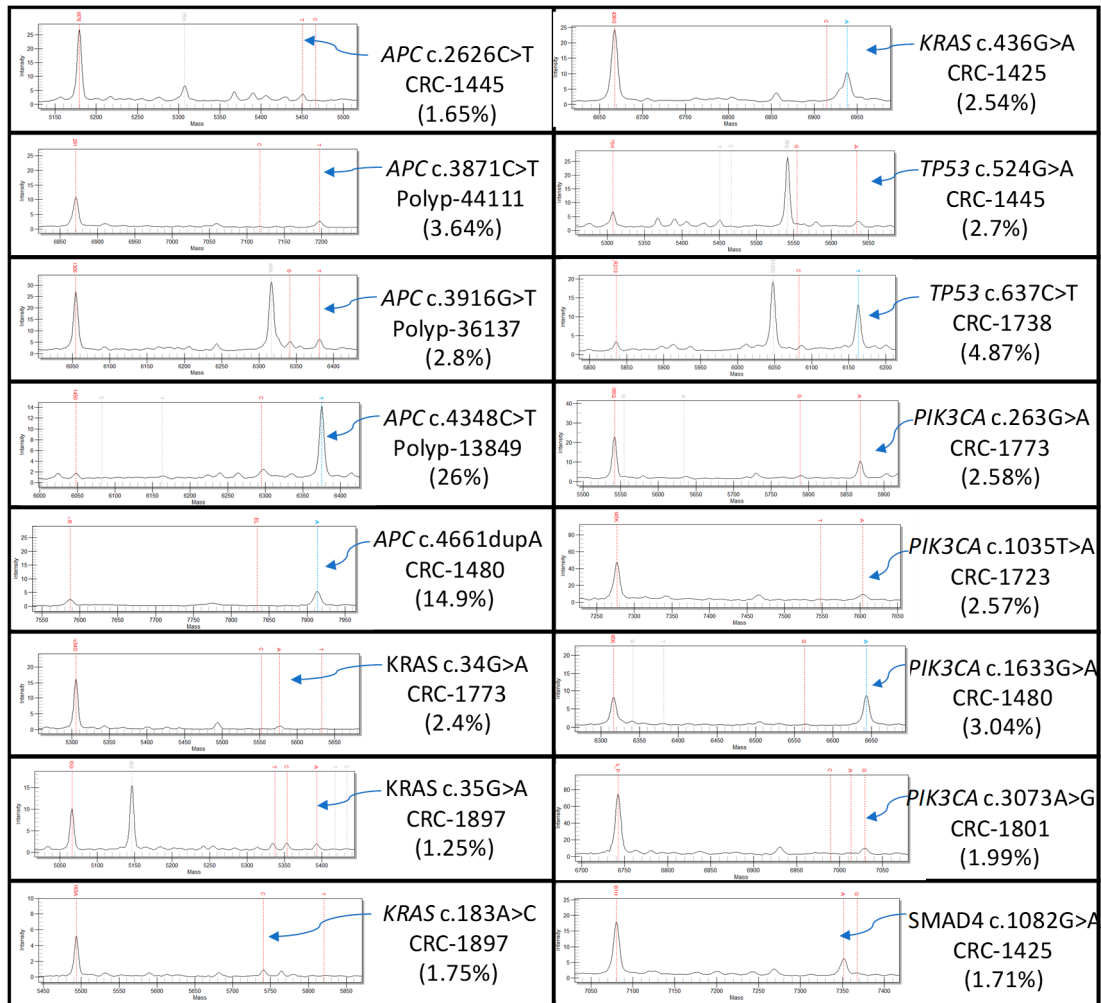

Supplement: cancers-11-00423-s001.pdf [file cancers-11-00423-s001.pdf]
